# Supplementary material
Source: HighWire-hosted journal article supplement (https://www.cmaj.ca/highwire/filestream/59506/field_highwire_adjunct_files/0/151233-medsoc-1-at.pdf)
Supplement: 151233-medsoc-1-at.pdf [file 151233-medsoc-1-at.pdf]

Appendix 1 (as supplied by the author): Supplemental photos

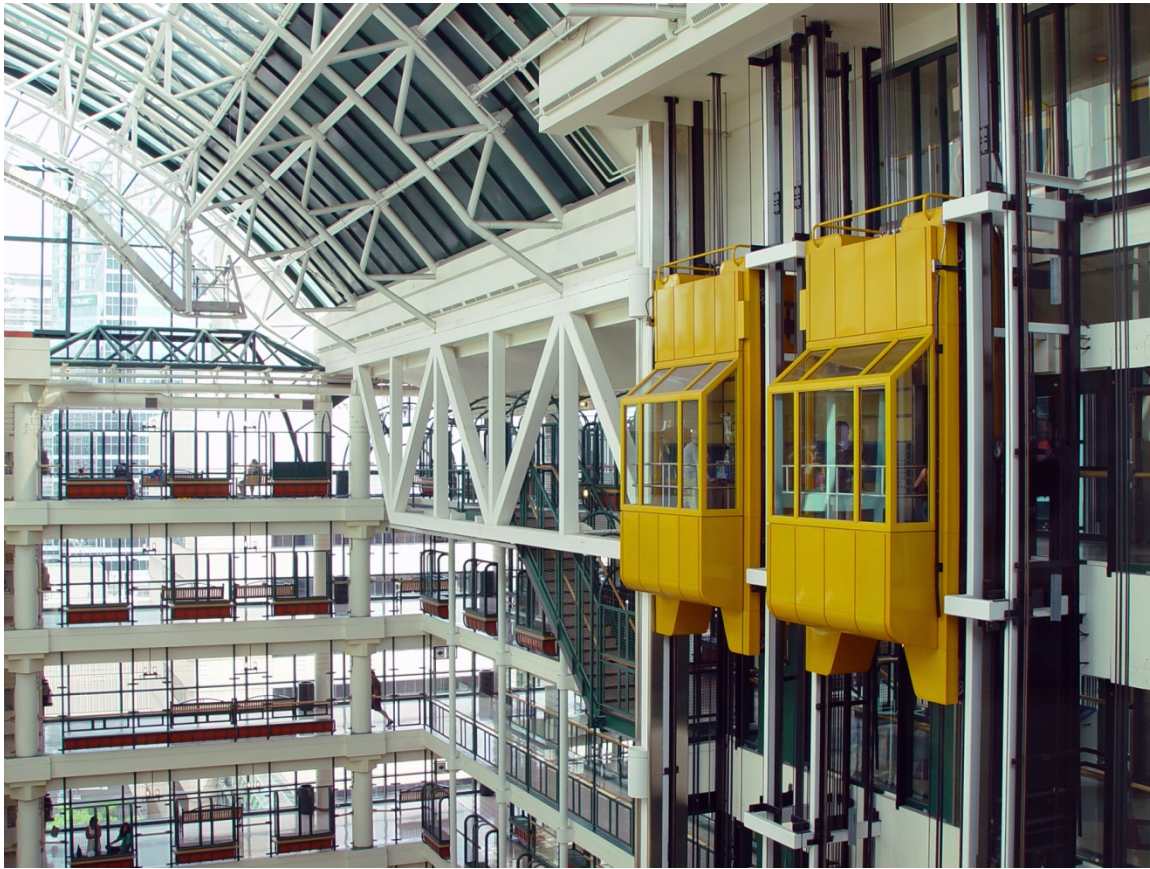

The atrium at SickKids. Photo credit: Ricardo L. Castro

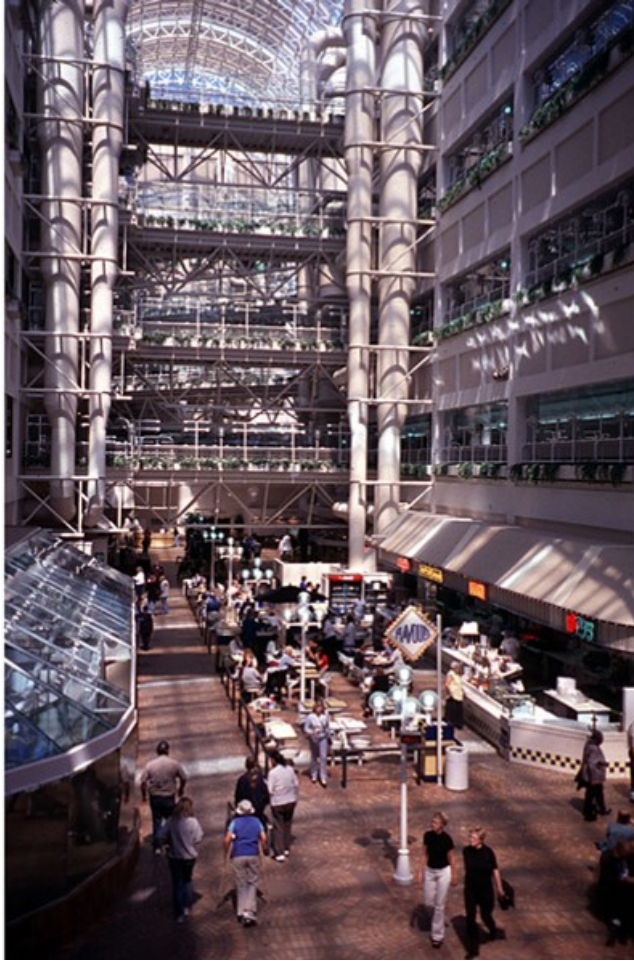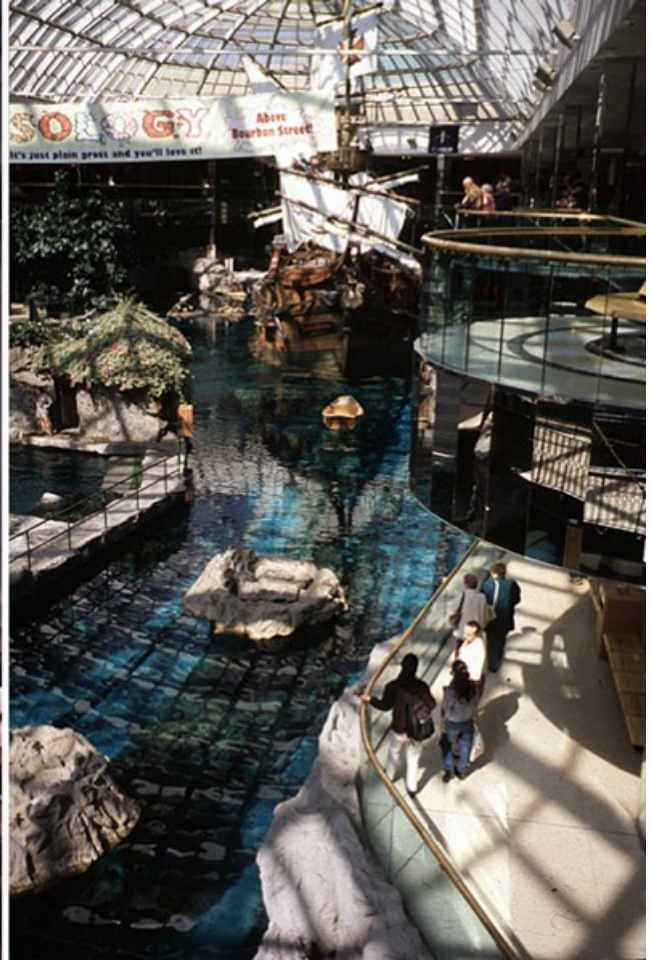

The Walter C. Mackenzie Health Sciences Centre in Edmonton and nearby West Edmonton Mall. Photo credit: Anmarie Adams



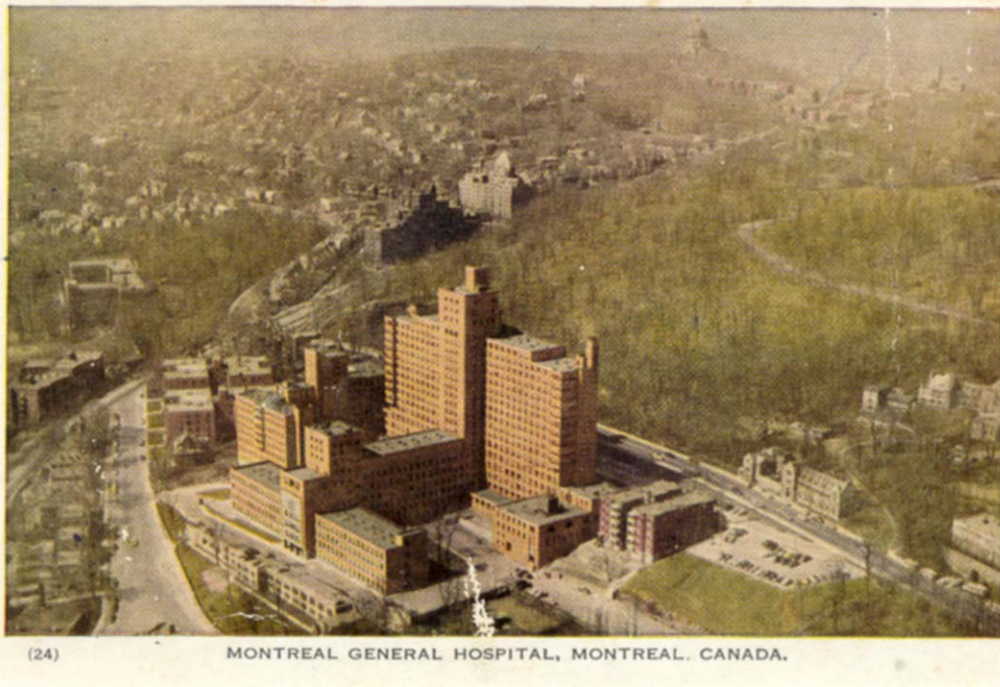

Vintage postcard of Montreal General Hospital. Collection: Annmarie Adams

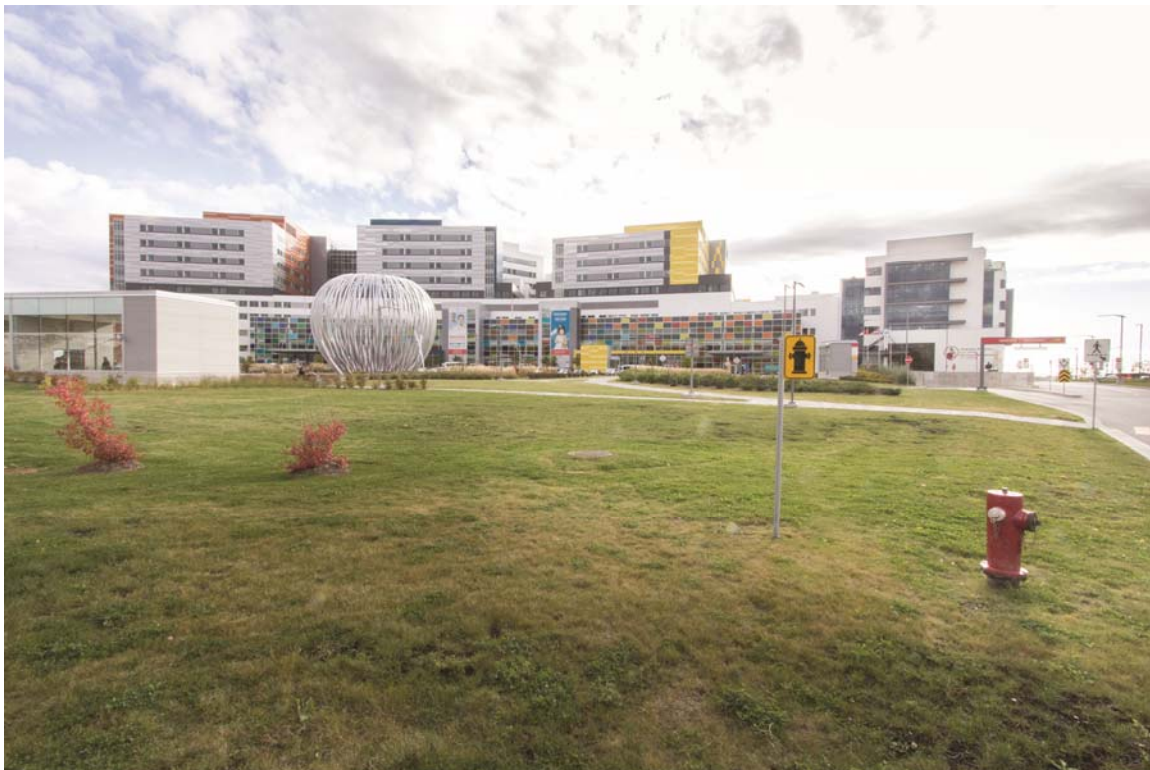

The newly opened McGill University Health Centre (MUHC), Montreal. Photo credit: Don Toromanoff
